# Supplementary material for: Identification of a Six-lncRNA Prognosis Model for Predicting Progression-Free Survival in Patients with Thyroid Cancer
Source: Research Square preprint supplement (doi:10.21203/rs.3.rs-1338110/v1), 2022-02-17
Supplement: Supplementary file 1 [file 5c672b447dc10aeb837b96c9.docx]

**Identification of a** **Six-lncRNA Prognosis Model for Predicting Progression-Free Survival in Patients with Thyroid Cancer**

**Supplementary Materials**


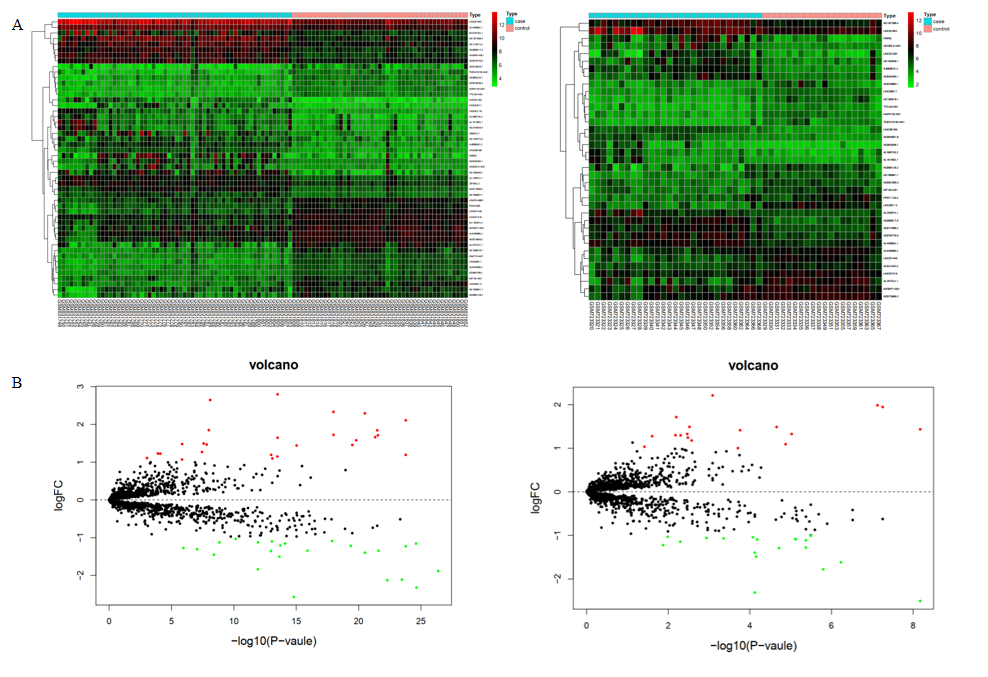


Supplementary Figure 1 Differential expression lncRNAs in GSE33630 and GSE29265. **A**. Heapmap of differential expression lncRNAs. **B**.Volcano plot of differential expression lncRNAs.


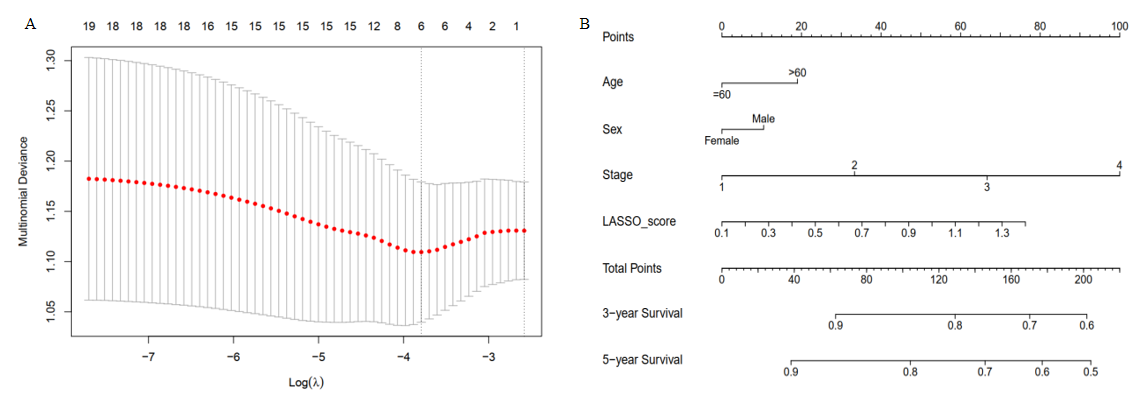


Supplementary Figure 2 Screening of the differential expression lncRNAs by Lasso regression. **A** The coefficient profile plot was generated against the lambda sequence. Selection of the optimal parameter (lambda) in the LASSO model. **B** a nomogram integrated with clinical features and risk score to predict progression-free survival probability.


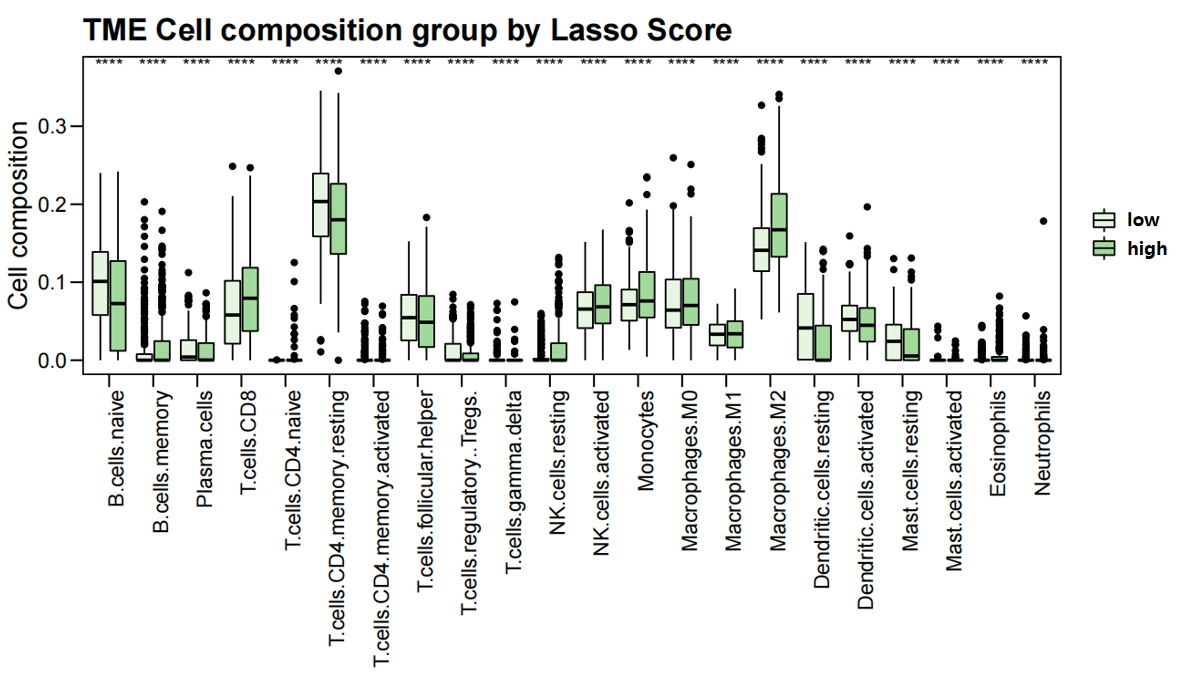


Supplementary Figure 3 Boxplot showing the difference of immune cell type expression between high and low lasso score groups. The low-risk group was marked as light green and the high-risk group was marked as dark green.
